# Supplementary material for: m6A potentiates Sxl alternative pre-mRNA splicing for robust Drosophila sex determination
Source: Springer Nature journal article supplement (doi:10.1038/nature20577), 2016-11-29

**Fig 2a**

| Genotype                                                                                       | Female viability |
|------------------------------------------------------------------------------------------------|------------------|
| Wild type                                                                                      | 89 % (357)       |
| +/+; +/+; <i>dIME4</i> <sup>null/Df</sup>                                                      | 60 % (676)       |
| <i>Sxl</i> <sup>null/+</sup> ; +/+; +/+                                                        | 103 % (116)      |
| <i>Sxl</i> <sup>null/+</sup> ; +/+; <i>dIME4</i> <sup>null/+</sup>                             | 13 % (338)       |
| <i>Sxl</i> <sup>null/+</sup> ; +/+; <i>dIME4</i> <sup>null/gdIME4</sup>                        | 87 % (127)       |
| <i>Sxl</i> <sup>null/+</sup> ; <i>msl2</i> <sup>null/Df</sup> ; +/+                            | 108 % (131)      |
| <i>Sxl</i> <sup>null/+</sup> ; <i>msl2</i> <sup>null/Df</sup> ; <i>dIME4</i> <sup>null/+</sup> | 106 % (173)      |

**Fig 2k**

| Genotype                                                                      | Female viability |
|-------------------------------------------------------------------------------|------------------|
| <i>fl(2)d<sup>1</sup>/fl(2)d<sup>1</sup></i> ; +/+                            | 0 % (148)        |
| <i>fl(2)d<sup>1</sup>/fl(2)d<sup>1</sup></i> ; <i>dIME4</i> <sup>null/+</sup> | 35 % (109)       |
| <i>vir<sup>2F</sup>/vir<sup>2F</sup></i> ; +/+                                | 0 % (127)        |
| <i>vir<sup>2F</sup>/vir<sup>2F</sup></i> ; <i>dIME4</i> <sup>null/+</sup>     | 76 % (276)       |

**Fig 2f: RTPCR gels used for quantification**

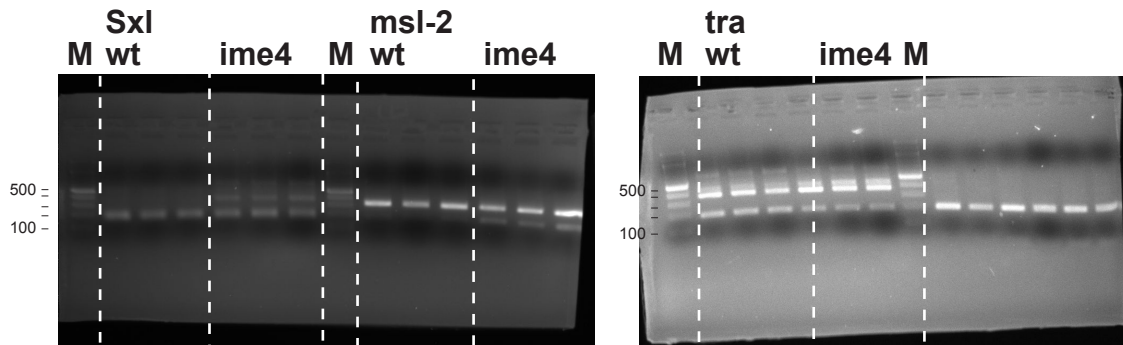

**Fig 2g**

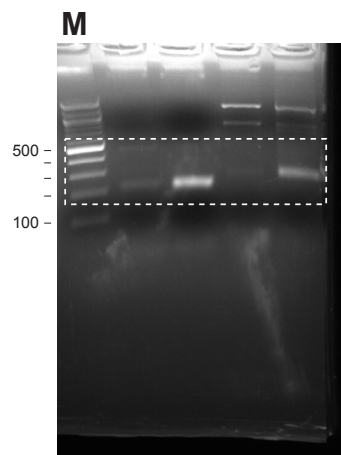

**Fig 2j low and high exposure**

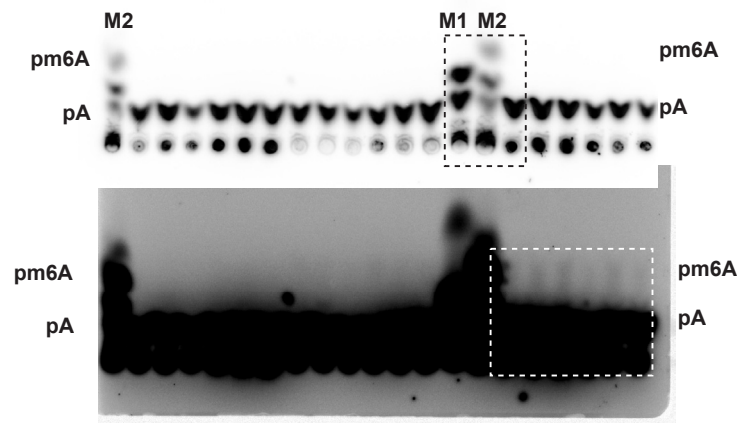

**Fig 4n**

| Genotype                                | Male viability |
|-----------------------------------------|----------------|
| <i>UAS YT521-B/+</i>                    | 102 % (121)    |
| <i>tubGAL4/UAS YT521-B</i>              | 2 % (104)      |
| <i>tubGAL4 dIME4<sup>null</sup>/</i>    |                |
| <i>UAS YT521-B dIME4<sup>null</sup></i> | 36 % (55)      |

**Fig 4j**

| Genotype                                                 | Female viability |
|----------------------------------------------------------|------------------|
| <i>+/+</i>                                               | 103 % (192)      |
| <i>YT521-B<sup>MIO2006</sup>/Df</i>                      | 100 % (112)      |
| <i>Sxl<sup>null</sup>/+; +/+</i>                         | 103 % (116)      |
| <i>Sxl<sup>null</sup>/+; YT521-B<sup>MIO2006</sup>/+</i> | 66 % (479)       |

**Fig 4d**

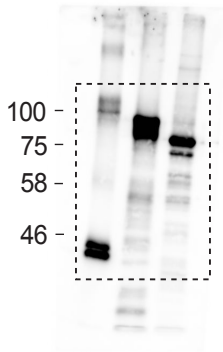

**Fig 4i**

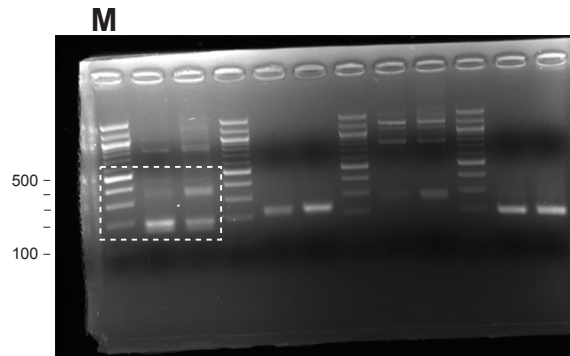

**Fig 4e**

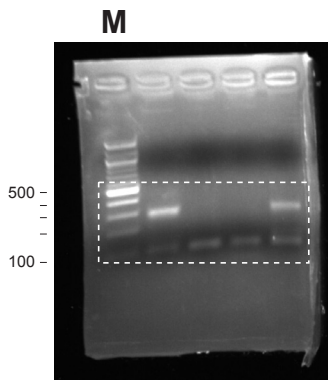

**Fig 4f**

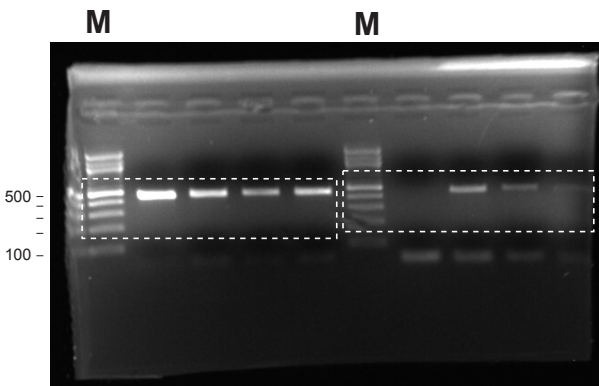

ED Fig 3b

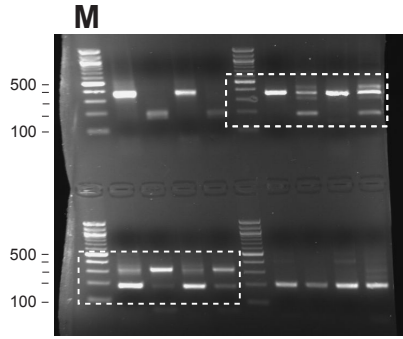

ED Fig 3a

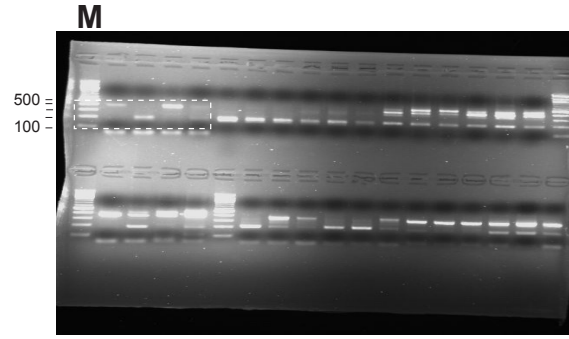

ED Fig 3c

ED Fig 5b low and high exposure

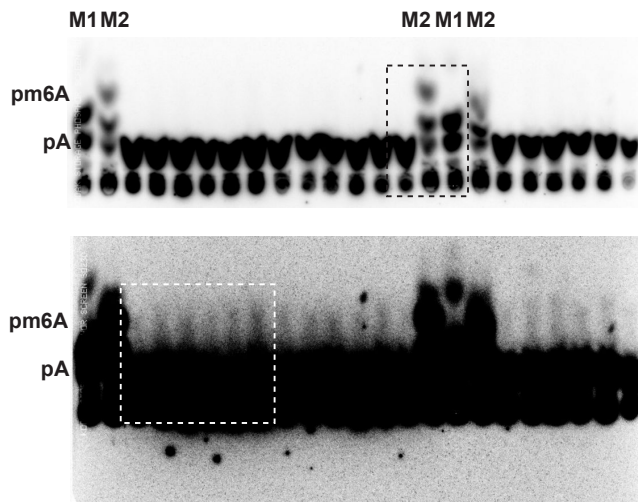

ED Fig 5c low and high exposure

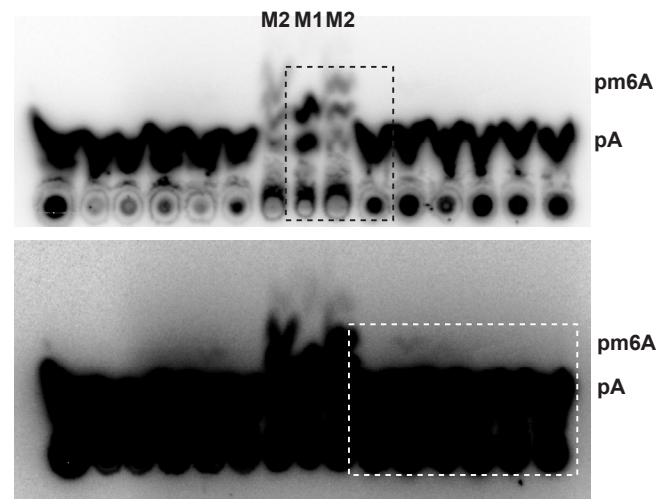

ED Fig 8

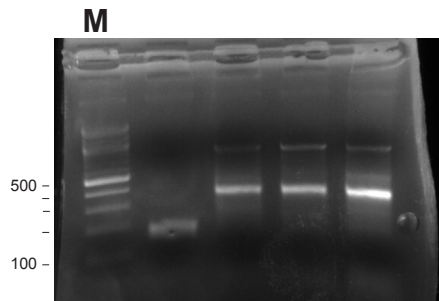

ED Fig 6

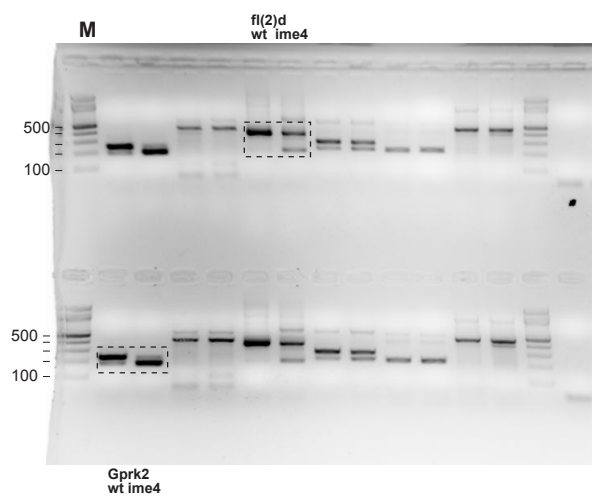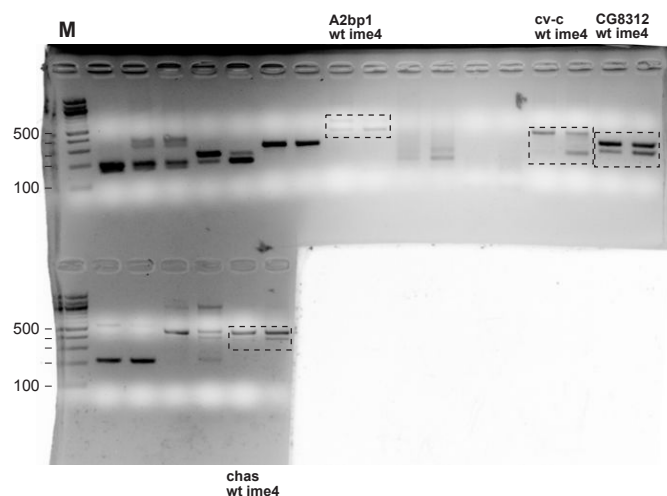

ED Fig 9b

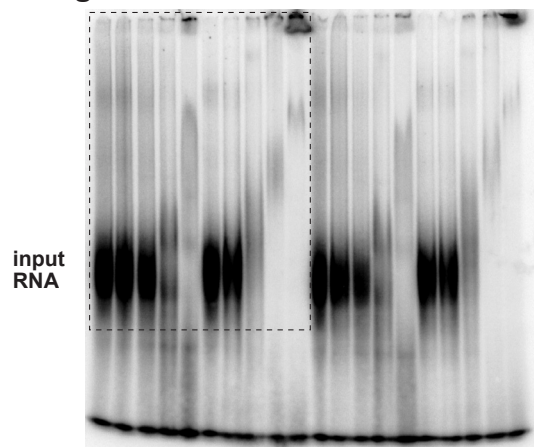

ED Fig 9d

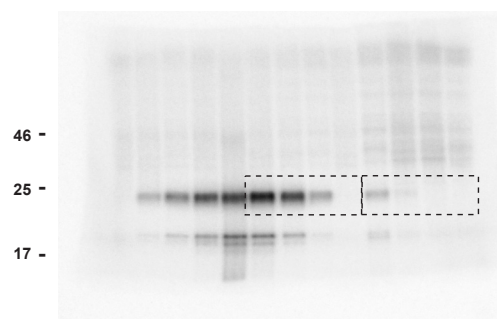

Supplement: 41586_2016_BFnature20577_MOESM90_ESM.pdf [file 41586_2016_BFnature20577_MOESM90_ESM.pdf]
